# Supplementary material
Source: publisher figshare collection journal article supplement (https://tandf.figshare.com/ndownloader/files/37564359)
Supplement: Supplementary file 1 [file 37564359]

**SUPPLEMENT**

**Table of Contents**

| Table 1: | Characteristics of study participants and non-participants…………………………………..…..…… | 2 |
| --- | --- | --- |
| Table 2: | Agreement between 3 different smartphone settings for detection of corneal opacity ………..…… | 3 |
| Figure 1: | Cumulative estimates of sensitivity across the range of time since corneal culture……………….. | 4 |

**Supplemental Table 1. Characteristics of study participants and non-participants**

|  | 0-12 months since corneal scraping | |  | >12 months since corneal scraping | |
| --- | --- | --- | --- | --- | --- |
| Characteristic | Participants  (N=89) | Non-participants  (N=259) |  | Participants  (N=85) | Non-participants  (N=912) |
| Male, N (%) | 56 (63%) | 175 (68%) |  | 60 (71%) | 544 (60%) |
| Age in years, mean (SD) | 46 (17) | 46 (20) |  | 46 (19) | 44 (19) |
| Time since culture, N (%) |  |  |  |  |  |
| 0-12 mos | 89 (100%) | 259 (100%) |  | 0 (0%) | 0 (0%) |
| 13-24 mos | 0 (0%) | 0 (0%) |  | 36 (42%) | 211 (23%) |
| >24 mos | 0 (0%) | 0 (0%) |  | 49 (58%) | 701 (77%) |

**Supplemental Table 2. Agreement between 3 different smartphone settings for detection of corneal opacity.** Photographs were taken in rapid succession with a Nexus 5 smartphone using the default settings, then changing the exposure to +1 (Exp+1), then changing to the high dynamic range (HDR) setting. Photographs were graded in a masked fashion for the presence of opacity. This table includes those eyes eligible for agreement analyses (i.e., absence of penetrating keratoplasty in either eye and no missing photographic data in either eye).

| Smartphone setting | | |  |
| --- | --- | --- | --- |
| Default | Exp+1 | HDR | Number |
| + | + | + | 112 |
| + | + | − | 2 |
| + | − | + | 3 |
| + | − | − | 1 |
| − | + | + | 1 |
| − | + | − | 3 |
| − | − | + | 1 |
| − | − | − | 163 |

**Supplemental Figure 1.** **Cumulative estimates of sensitivity across the range of time elapsed since corneal culture.** The 90 eyes with a reference standard opacity were ordered from most recent to longest time since corneal culture, and sensitivity was estimated cumulatively along this ordered set of 90 opacities. Specifically, for each corneal opacity, the cumulative sensitivity was estimated including all eyes with the same or a more recent opacity. Panel A shows the cumulative sensitivity for the individual 13 graders (each in a different color), and Panel B shows the cumulative sensitivity for the consensus grade. In panel B, each dot represents an eye; dots are colored according to their visual acuity status have some transparency in order to better depict overlying points.
